# Supplementary material for: Drug exposure during breastfeeding: a descriptive population- based cohort study with SIDIAP database
Source: Research Square preprint supplement (doi:10.21203/rs.3.rs-7091470/v1), 2025-08-27
Supplement: Supplementary file 1 [file 79f67084f11e9dcc263aed54.docx]

### Supplementary table 1. ICD-10-CM codes for diagnoses in mothers

| **ICD-10-CM codes** | **Description** |
| --- | --- |
| A50*-A64* | Infections that are transmitted mainly sexually |
| A92.5 | Zika virus disease |
| B01* | Varicella |
| B02* | Zoster Herpes |
| B08.1 | Molluscum contagiosum |
| B15*-B19* | Viral hepatitis |
| B20*-B24* | HIV |
| B25* | Citomegalovirus |
| B34.2, B97.21, B97.29, J12.8, U07.1, Z20.822, Z20.828 | COVID-19 |
| B37.3, B37.4 | Genital candidiasis |
| B57* | Chagas disease |
| B58* | Toxoplasma |
| C00*-D49* | Neoplasia |
| D50* | Anims |
| D80* | Immunodeficiencies |
| E10*-E14* | Diabetes mellitus |
| E22.1 | Hyperprolactinemia |
| E28.2, E28.3, Z79.890 | Ovarian disorders |
| E66* | Obesity |
| E78* | Dyslipidemia |
| F00*-F09* | Mental disorders |
| F10*-F19* | Disorders use tobacco, alcohol, drugs |
| F20*-F29* | Psychosis |
| F30*-F39* | Bipolar depression/disorder |
| F40*-F48* | Anxiety |
| F50* | Feeding disorders |
| F52*, R37* | Sexual dysfunction |
| F60*-F69* | Personal disorder |
| G35* | Multiple sclerosis |
| G40* | Epilepsy |
| G43* | Migraine |
| I10*-I15* | High blood pressure |
| I20*-I25* | Ischemic heart disease |
| I26*, I74*, I80.9* | Thromboembolisms |
| I48* | Atrial fibrillation |
| I50* | Heart failure |
| I60*-I69*, G45*-G46* | Cerebrovascular disease |
| J40*-J47*, J60*-J99*, G47.3 | Respiratory diseases |
| L28.0, L90.0 | Lichens |
| L29.2 | Vulvar pruritus |
| L40* | Psoriasis |
| L68.0 | Hirsutism |
| L93* | Lupus |
| M05*-M09* | Rheumatoid arthritis |
| N10*, N30*, N34*, N39* | Urinary infections |
| N18* | Chronic kidney disease |
| N60*, N61*, N63*, N64* | Alterations in the breast |
| N70.03, N70.13 | Salpingitis and oophoritis |
| N71*-N73* | Inflammatory disease of the uterus and annexes |
| N75*-N76* | Other inflammations of vulva and vagina |
| N80*-N98* | Non-inflammatory disorders of the female genital tract |
| N99* | Post-vaginal surgery disorders |
| O00*-O08* | Pregnancy with abortive result |
| O09* | Supervision of high-risk pregnancy |
| O10*-O16* | Oedema, proteinuria and hypertensive disorders in pregnancy, childbirth and puerperium |
| O20*-O29* | Other maternal disorders related especially to pregnancy |
| O30*-O48* | Maternal assistance related to the fetus and the amnic cavity and possible problems in childbirth |
| O60*-O77* | Complications of labor and labor |
| O80*-O82* | Labor assistance |
| O85*-O92* | Complications related especially to the child |
| O94*-O09A | Other obstetric conditions not classified elsewhere |
| Q50*-Q56*, Q83* | Congenital genital malformations |
| Q90*-Q99* | Chromosomal alterations |
| R15*, R30*-R36*, R39* | Urinary and fecal disorders (incontinence) |
| R85* | Anal Pathology |
| T74.2, T74.6, T74.9, T76.2, T76.6, T76.9, Y07.01, Y07.12 | Mistreatment and sexual abuse |
| Z03.7* | Assistance for discarded suspected fetal and maternal conditions |
| Z30* | Assistance for contraceptive treatment |
| Z31* | Assistance for reproduction treatment |
| Z32* | Assistance for pregnancy test and training on childbirth and baby care |
| Z33* | Gestation status |
| Z34* | Assistance for normal pregnancy supervision |
| Z3A* | Weeks of gestation |
| Z37* | Labor result |
| Z38* | Babies born alive according to the place of birth and the type of birth |
| Z39* | Assistance for care and postpartum maternal exploration |
| Z64.0 | Problems related to unwanted pregnancy |
| Z64.1 | Problems related to multiparity |
| Z86.32 | Personal history of gestational diabetes |
| Z87.5* | Personal history of complications of pregnancy, childbirth and puerperium |
| Z94* | Transplant |

### Supplementary table 2. ATC codes for drugs

| **ATC codes** | **Description** |
| --- | --- |
| A02 | Drugs for acid related disorders |
| A04A | Antiemetics |
| A06 | Laxatives |
| A07 | Antidiarrheals, intestinal anti-inflammatory/anti-infective agents |
| A08 | Antiobesity preparations |
| A10 | Drugs used in Diabetes |
| A11 | Vitamin |
| B01 | Antithrombotic agents |
| B03 | Antianemic preparations |
| C01-C10 | Cardiovascular system |
| D01-D10 | Dermatologicals |
| G01-G04 | Genitourinary system and sex hormones |
| H01-H05 | Systemic hormonal preparations, excluding sex hormones and insulins |
| J01-J07 | Antiinfectives for systemic use |
| L01-L04 | Antineoplastic and immunomodulating agents |
| M01, M04, M05 | Musculo-skeletal system |
| N01-N07 | Nervous system |
| P01-P03 | Antiparasitic products |
| R03-R06 | Respiratory system |

### Supplementary table 3. Drug exposure in mothers at the four time-cuts; up to 2, 4, 6 and 12 months*

| **Drugs in ≥0.5% mothers, n (%)** | **Up to 2 months after birth**  **N= 76,064** | **Months (2,4]**  **N= 32,475** | **Months (4,6]**  **N= 17,396** | **Months (6,12]**  **N= 20,433** |
| --- | --- | --- | --- | --- |
|
| Oral iron | 40972 (23.2) | 7439 (5.0) | 2503 (2.5) | 1791 (2.8) |
| Analgesics | 18670 (10.6) | 6950 (4.7) | 4125 (4.2) | 6944 (10.8) |
| Folic acid | 25832 (14.7) | 6314 (4.3) | 2836 (2.9) | 1822 (2.8) |
| Beta-lactam antibacterials | 12058 (6.8) | 6599 (4.5) | 3768 (3.8) | 6357 (9.9) |
| NSAID | 12449 (7.1) | 5269 (3.6) | 3363 (3.4) | 6291 (9.8) |
| Vitamin B12 | 21120 (12.0) | 5478 (3.7) | 2494 (2.5) | 1549 (2.4) |
| Gynecological anti-infectives and antiseptics | 3276 (1.9) | 1439 (0.97) | 771 (0.78) | 1326 (2.1) |
| Other antibacterials | 3610 (2.1) | 1045 (0.7) | 539 (0.6) | 1057 (1.7) |
| Systemic antihistamines | 1811 (1.0) | 1470 (1.0) | 933 (0.95) | 1866 (2.9) |
| Heparins | 4991 (2.8) | 155 (0.1) | 48 (0.05) | 67 (0.1) |
| Thyroid hormones | 2097 (1.2) | 1365 (0.92) | 947 (0.96) | 1312 (2.0) |
| Beta-2-adrenoceptor agonists, inhaled | 1444 (0.82) | 1175 (0.79) | 740 (0.75) | 1120 (1.7) |
| Proton pump inhibitors | 1242 (0.7) | 739 (0.5) | 502 (0.51) | 914 (1.4) |
| Macrolides | 795 (0.45) | 603 (0.41) | 332 (0.34) | 695 (1.1) |
| Glucocorticoids inhaled | 959 (0.54) | 776 (0.52) | 507 (0.51) | 755 (1.2) |
| Anxiolytics, hypnotics and sedatives | 721 (0.41) | 626 (0.42) | 369 (0.37) | 584 (0.91) |
| H2 – receptor antagonists | 1533 (0.87) | 196 (0.13) | 105 (0.11) | 133 (0.21) |
| Other systemic hormonal preparations, excluding sex hormones and insulins | 683 (0.39) | 421 (0.28) | 291 (0.3) | 476 (0.74) |
| SSRI antidepressants | 838 (0.48) | 775 (0.52) | 486 (0.49) | 571 (0.89) |
| Laxatives | 1093 (0.62) | 444 (0.3) | 161 (0.16) | 125 (0.19) |
| Beta-blockers | 1404 (0.8) | 442 (0.3) | 202 (0.2) | 141 (0.22) |
| Other beta-lactam antibacterials | 952 (0.54) | 280 (0.19) | 140 (0.14) | 212 (0.33) |
| Quinolones | 641 (0.36) | 401 (0.27) | 153 (0.16) | 311 (0.48) |
| Vitamins | 887 (0.5) | 221 (0.15) | 106 (0.11) | 97 (0.15) |

*Includes frequencies≥0.5% of mothers with exposures in at least one of the time-cuts.

NSAID: non-steroidal anti-inflammatory drugs. SSRI: selective-serotonin reuptake inhibitors
